# Supplementary material
Source: publisher figshare collection journal article supplement (https://sage.figshare.com/ndownloader/files/13216181)
Supplement: Supplementary file 1 [file 13216181]

**Supplemental material**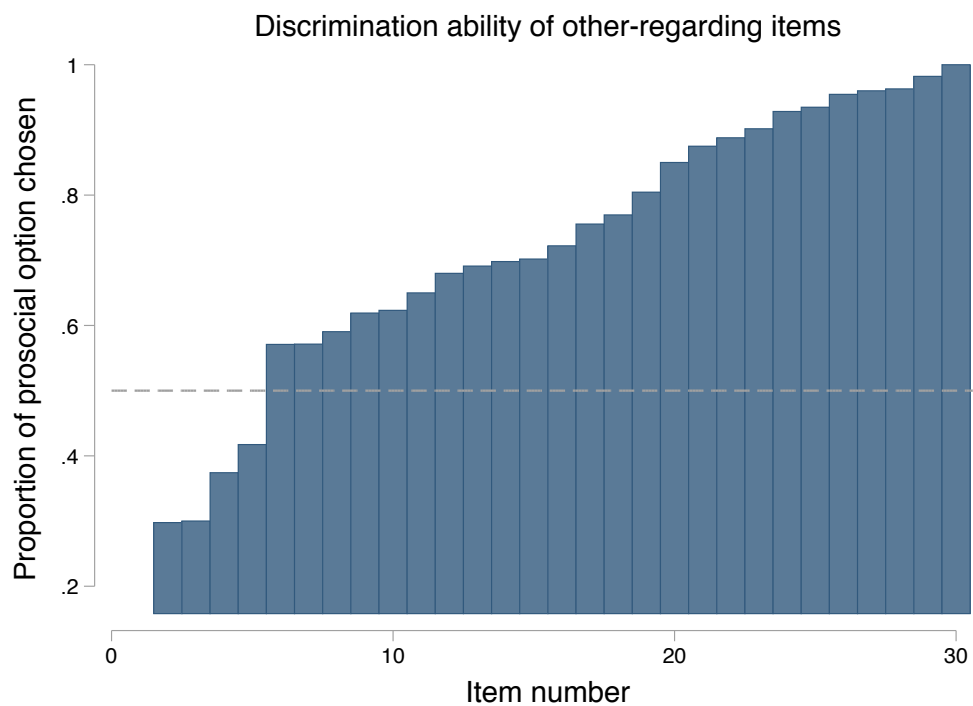**Fig. S1.**

Distribution of prosocial choices for each other-regarding item. Dashed line at proportion = 0.5 indicates where the number of choices in favor of the prosocial and individualistic option was equal.

### Study 1

The presented tables provide a more detailed overview of the analyses that were conducted, including any control variables.

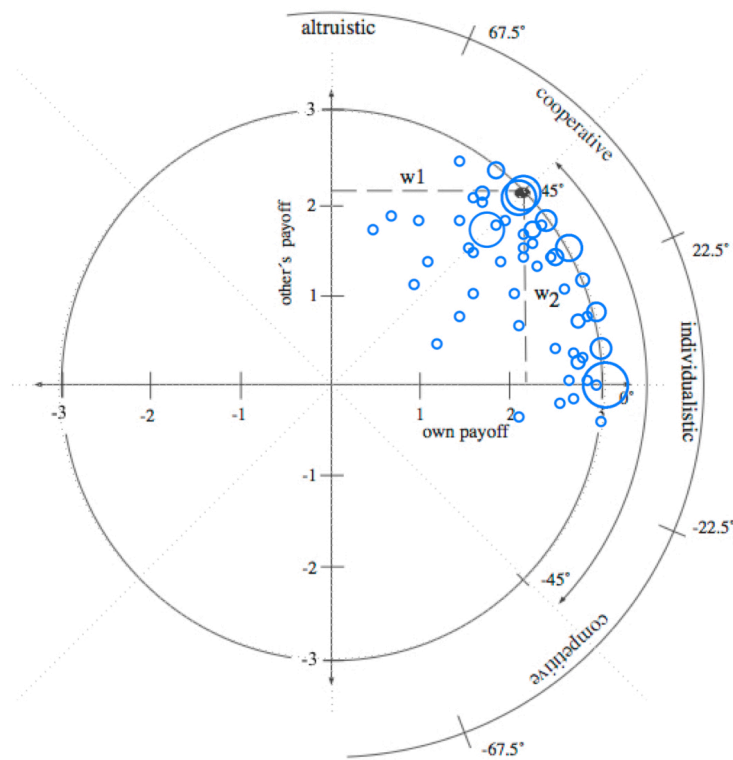

**Fig. S2.**

Participant's Social Value Orientation (SVO) in Study 1 according to the SVO Ring Measure.

SVO angle is measured in degrees

**Table S1**

*Choice of right option predicted by last fixation for self-determined (A), interrupted (B) and all trials (C). Separate analysis for other-regarding and moral choices.*

| (A) Self-determined | (B) Interrupted   | (C) All trials    |
|---------------------|-------------------|-------------------|
| OR (right option)   | OR (right option) | OR (right option) |

|                 | Social              | Moral                | Social              | Moral               | Social              | Moral               |
|-----------------|---------------------|----------------------|---------------------|---------------------|---------------------|---------------------|
| Last fixation   | 6.24 <sup>***</sup> | 10.66 <sup>***</sup> | 2.67 <sup>***</sup> | 3.78 <sup>***</sup> | 3.50 <sup>***</sup> | 4.71 <sup>***</sup> |
| right           | (8.18)              | (11.03)              | (7.35)              | (9.53)              | (11.40)             | (14.44)             |
| Relative time   | 9.13 <sup>***</sup> | 11.97 <sup>***</sup> | 2.27 <sup>***</sup> | 4.21 <sup>***</sup> | 3.01 <sup>***</sup> | 4.45 <sup>***</sup> |
| advantage right | (7.50)              | (11.10)              | (4.74)              | (7.70)              | (8.63)              | (13.25)             |
| SVO Angle       | 0.99                | -                    | 1.00                | -                   | 1.00                | -                   |
|                 | (-0.25)             |                      | (0.97)              |                     | (1.12)              |                     |
| SVO Angle ×     | 1.01                | -                    | 1.00                | -                   | 0.99                | -                   |
| Last fixation   | (0.55)              |                      | (-0.46)             |                     | (-0.86)             |                     |
| Confidence      | 0.98                | 0.96                 | 0.92 <sup>*</sup>   | 0.97                | 0.93 <sup>*</sup>   | 0.97                |
|                 | (-0.37)             | (-0.79)              | (-2.14)             | (-0.67)             | (-2.41)             | (-1.00)             |
| Trial number    | 0.99 <sup>*</sup>   | 1.00                 | 1.00                | 1.00                | 1.00                | 1.00                |
|                 | (-1.98)             | (-0.38)              | (1.60)              | (0.65)              | (0.96)              | (1.22)              |
| Constant        | 1.14                | 1.06                 | 0.83 <sup>**</sup>  | 0.82 <sup>**</sup>  | 0.92                | 0.50 <sup>**</sup>  |
|                 | (1.13)              | (0.62)               | (-2.99)             | (-2.98)             | (-1.71)             | (-3.29)             |
| Observations    | 1179                | 1329                 | 1404                | 1448                | 3243                | 3368                |

Note. Odds Ratios; z statistics in parentheses, <sup>\*</sup>  $p < .05$ , <sup>\*\*</sup>  $p < .01$ , <sup>\*\*\*</sup>  $p < .001$ . All variables are centered.

Table S2

*Choice of right option predicted by last fixation and interrupted trial for other-regarding choices (A), moral choices (B) and all trials (C).*

|               | (A) Other-regarding         | (B) Moral                   | (C) All trials              |
|---------------|-----------------------------|-----------------------------|-----------------------------|
|               | OR (right option)           | OR (right option)           | OR (right option)           |
| Last fixation | 4.02 <sup>***</sup> (10.74) | 5.96 <sup>***</sup> (14.83) | 4.21 <sup>***</sup> (15.97) |
| right         |                             |                             |                             |

|                               |                            |                             |                             |
|-------------------------------|----------------------------|-----------------------------|-----------------------------|
| Interrupted                   | 0.78 <sup>*</sup> (-2.14)  | 0.76 <sup>**</sup> (-2.66)  | 0.77 <sup>***</sup> (-3.91) |
| Last fixation × Interrupted   | 0.52 <sup>**</sup> (-2.97) | 0.44 <sup>***</sup> (-3.75) | 0.65 <sup>**</sup> (-3.04)  |
| Relative time advantage right | 4.67 <sup>***</sup> (8.90) | 7.27 <sup>***</sup> (16.03) | 3.54 <sup>***</sup> (12.27) |
| Confidence                    | 0.94 (-1.86)               | 0.97 (-0.92)                | 0.94 <sup>**</sup> (-3.02)  |
| Trial number                  | 1.00 (0.06)                | 1.00 (0.42)                 | 1.00 (0.84)                 |
| Constant                      | 0.94 (-1.13)               | 0.91 <sup>*</sup> (-1.58)   | 0.94 (-1.62)                |
| Observations                  | 2675                       | 2777                        | 6724                        |

Note. Odds Ratios;  $z$  statistics in parentheses, <sup>\*</sup>  $p < .05$ , <sup>\*\*</sup>  $p < .01$ , <sup>\*\*\*</sup>  $p < .001$ . All variables are centered.

Table S3

*Comparison of other-regarding and moral choices. Choice of right option predicted by last fixation for self-determined (A), interrupted (B) and all trials (C).*

|                               | (A) Self-determined         | (B) Interrupted             | (C) All trials              |
|-------------------------------|-----------------------------|-----------------------------|-----------------------------|
|                               | OR (right option)           | OR (right option)           | OR (right option)           |
| Last fixation right           | 7.99 <sup>***</sup> (11.28) | 3.22 <sup>***</sup> (10.41) | 4.08 <sup>***</sup> (15.40) |
| Moral item                    | 0.97 (-0.22)                | 0.98 (-0.22)                | 0.99 (-0.08)                |
| Moral item × Last fixation    | 1.65 <sup>*</sup> (2.39)    | 1.31 (1.69)                 | 1.27 <sup>*</sup> (2.11)    |
| Relative time advantage right | 9.98 <sup>***</sup> (9.31)  | 3.02 <sup>***</sup> (8.22)  | 3.54 <sup>***</sup> (12.50) |
| Confidence                    | 0.96 (-0.85)                | 0.95 <sup>*</sup> (-2.18)   | 0.95 <sup>*</sup> (-2.54)   |
| Trial number                  | 0.99 <sup>*</sup> (-2.23)   | 1.00 (1.64)                 | 1.00 (1.11)                 |
| Constant                      | 1.11 (1.30)                 | 0.75 <sup>***</sup> (-3.60) | 0.93 <sup>*</sup> (-1.96)   |

|              |      |      |      |
|--------------|------|------|------|
| Observations | 2540 | 2912 | 6724 |
|--------------|------|------|------|

*Note.* Odds Ratios;  $z$  statistics in parentheses, \*  $p < .05$ , \*\*  $p < .01$ , \*\*\*  $p < .001$ . All variables are centered.

### Influence of SVO

To put the observed effect of the last fixation on the likelihood to decide for the more prosocial option into context of another well studied effect, we used SVO as an additional behavioral predictor in the primary regression model. The results showed that, as in other studies, participants with a high SVO angle were more likely to make prosocial choices (OR = 1.01,  $z = 2.51$ ,  $p = .012$ ). In particular, that means that the pure individualist (SVO angle =  $0^\circ$ ) made on average 8.25% fewer prosocial choices than an ideally prosocial (SVO angle =  $45^\circ$ ) participant. Testing the effect of the last fixation on the subsequent choice in the interrupted (self-determined) trials, the analysis revealed that in case the prosocial option was attended to last, the odds ratio of choosing the prosocial option was 2.12 ( $z = 6.07$ ,  $p < .001$ , self-determined: OR = 6.52,  $z = 9.20$ ,  $p < .001$ ). Specifically, attending the prosocial option last increased the probability of choosing it by 15.19% (self-determined: 36.35%). Investigating the influence of SVO angle further, we found that it did not have an impact on the size of the attention-choice relationship (OR = 1.01,  $z = 0.55$ ,  $p = .583$ ), and neither on the strength of the bottom-up effect of attention on choices (OR = 1.00,  $z = -0.46$ ,  $p = .649$ ) in the interrupted trials. Additionally, the results showed that SVO angle did not have an impact on whether a participant made a self-determined choice (OR = 1.00,  $z = -0.34$ ,  $p = .737$ ) or was timed out (OR = 1.00,  $z = 0.20$ ,  $p = .839$ ). See Table S4 for the complete analysis.

Table S4

*Choice of prosocial option predicted by SVO Angle for self-determined (A), interrupted (B) and all trials (C).*

|               | (A) Self-determined        | (B) Interrupted            | (C) All trials              |
|---------------|----------------------------|----------------------------|-----------------------------|
|               | OR (prosocial)             | OR (prosocial)             | OR (prosocial)              |
| Last fixation | 6.52 <sup>***</sup> (9.20) | 2.12 <sup>***</sup> (6.07) | 3.16 <sup>***</sup> (10.38) |
| prosocial     |                            |                            |                             |
| SVO Angle     | 1.01 <sup>*</sup> (2.51)   | 1.01 (1.53)                | 1.01 <sup>*</sup> (2.51)    |
| Trial number  | 1.00 (-1.40)               | 1.00 (0.91)                | 1.00 (0.43)                 |
| Constant      | 0.99 (-0.04)               | 1.05 (0.33)                | 0.95 (-0.42)                |
| Observations  | 1179                       | 1404                       | 3243                        |

Note. Odds Ratios; z statistics in parentheses, <sup>\*</sup>  $p < .05$ , <sup>\*\*</sup>  $p < .01$ , <sup>\*\*\*</sup>  $p < .001$ .

Table S5

*Separate analysis for other-regarding and moral choices. Choice of right option predicted by position of target for self-determined (A), interrupted (B) and all trials (C).*

|                 | (A) Self-determined |                     | (B) Interrupted     |                     | (C) All trials      |                     |
|-----------------|---------------------|---------------------|---------------------|---------------------|---------------------|---------------------|
|                 | OR (right option)   |                     | OR (right option)   |                     | OR (right option)   |                     |
|                 | Social              | Moral               | Social              | Moral               | Social              | Moral               |
| Target right    | 0.47 <sup>***</sup> | 0.48 <sup>***</sup> | 2.65 <sup>***</sup> | 3.78 <sup>***</sup> | 1.11                | 1.28 <sup>**</sup>  |
|                 | (-4.32)             | (-5.48)             | (7.15)              | (9.53)              | (1.32)              | (3.37)              |
| Relative time   | 8.64 <sup>***</sup> | 8.94 <sup>***</sup> | 2.26 <sup>***</sup> | 4.21 <sup>***</sup> | 2.98 <sup>***</sup> | 4.67 <sup>***</sup> |
| advantage right | (8.70)              | (10.12)             | (4.75)              | (7.70)              | (8.56)              | (12.48)             |
| Confidence      | 0.98                | 0.98                | 0.92 <sup>*</sup>   | 0.97                | 0.96                | 0.98                |
|                 | (-0.31)             | (-0.54)             | (-2.31)             | (-0.67)             | (-1.58)             | (-0.78)             |
| Trial number    | 0.99 <sup>*</sup>   | 1.00                | 1.00                | 1.00                | 1.00                | 1.00                |
|                 | (-2.49)             | (-1.02)             | (1.69)              | (0.65)              | (-0.10)             | (0.67)              |
| Constant        | 2.81 <sup>**</sup>  | 2.29                | 0.74                | 0.48 <sup>**</sup>  | 1.26                | 0.97                |

|              |        |        |         |         |        |         |
|--------------|--------|--------|---------|---------|--------|---------|
|              | (2.60) | (2.53) | (-1.36) | (-2.89) | (1.28) | (-0.15) |
| Observations | 1211   | 1329   | 1464    | 1448    | 3356   | 3368    |

*Note.* Odds Ratios; *z* statistics in parentheses, \*  $p < .05$ , \*\*  $p < .01$ , \*\*\*  $p < .001$ .

We additionally tested whether making prosocial choices was linked to fulfilling the criteria of the gaze contingent paradigm. The results indicate that prosocial choices are more likely to be self-determined than interrupted (Table S6A). This finding is in line with prosocial options being chosen in more than half of the trials (67.2%), indicating a tendency to choose the more prosocial option and consequently increasing the likelihood of self-determined choices.

Table S6

*Likelihood for the classification as a self-determined choices (A) or a timeout (B) predicted by confidence level, importance, SVO angle, target choice, trial, position of chosen option and type of choice.*

|                         | Other-regarding choices |                 | Moral choices     |                 |
|-------------------------|-------------------------|-----------------|-------------------|-----------------|
|                         | (A) OR                  | (B) OR          | (C) OR            | (D) OR          |
|                         | (self-determined)       | (timeout)       | (self-determined) | (timeout)       |
| Confidence level        | 1.32*** (5.97)          | 0.91* (-2.42)   | 1.56*** (9.26)    | 0.91* (-2.55)   |
| Importance              | 1.00 (0.00)             | 1.00 (-0.04)    | 1.01 (0.20)       | 0.99 (-0.12)    |
| SVO angle               | 1.00 (-0.34)            | 1.00 (0.20)     | -                 | -               |
| Choice of target option | 0.28*** (-11.37)        | 0.51*** (-5.78) | 0.22*** (-12.04)  | 0.34*** (-8.32) |
| Trial number            | 1.01** (3.26)           | 1.00 (0.89)     | 1.01*** (4.47)    | 1.00 (1.29)     |
| Choice of               | 1.30* (2.06)            | 1.12 (1.02)     | 1.40** (3.15)     | 1.11 (0.87)     |

|              |                 |              |                 |             |
|--------------|-----------------|--------------|-----------------|-------------|
| right option |                 |              |                 |             |
| Prosocial    | 1.35* (2.31)    | 0.84 (-1.57) | -               | -           |
| option       |                 |              |                 |             |
| Constant     | 0.13*** (-5.89) | 0.81 (-0.75) | 0.05*** (-7.55) | 0.74 (1.09) |
| Observations | 2583            | 2064         | 2777            | 2039        |

Note. Odds Ratios; z statistics in parentheses, \*  $p < .05$ , \*\*  $p < .01$ , \*\*\*  $p < .001$ .

Table S7

*Choice of right option predicted by last fixation for (A) self-determined choices, (B) interrupted choices and (C) all trials. Model (1) does not include trial number as a control variable, (2) controls for trial number and (3) includes an interaction between trial number and last fixation.*

|                            | (A) Self-determined |                 |                 |
|----------------------------|---------------------|-----------------|-----------------|
|                            | (1)                 | (2)             | (3)             |
| Last fixation right        | 8.05*** (11.34)     | 7.99*** (11.28) | 9.41*** (11.65) |
| Relative time              | 9.85*** (9.15)      | 9.89*** (9.25)  | 4.85*** (9.06)  |
| advantage right            |                     |                 |                 |
| Confidence                 | 0.96 (-0.94)        | 0.96 (-0.89)    | 0.96 (-1.01)    |
| Trial number               | -                   | 0.99* (-2.16)   | 1.00* (-2.22)   |
| Trial number $\times$ last | -                   | -               | 1.00 (0.37)     |
| fixation right             |                     |                 |                 |
| Constant                   | 0.52* (-2.31)       | 0.63* (-1.52)   | 1.11 (1.28)     |
| Observations               | 2540                | 2540            | 2540            |



|                     | (B) Interrupted             |                             |                             |
|---------------------|-----------------------------|-----------------------------|-----------------------------|
|                     | (1)                         | (2)                         | (3)                         |
| Last fixation right | 3.21 <sup>***</sup> (10.49) | 3.22 <sup>***</sup> (10.53) | 3.39 <sup>***</sup> (10.68) |
| Relative time       | 3.03 <sup>***</sup> (8.26)  | 3.05 <sup>***</sup> (8.33)  | 2.32 <sup>***</sup> (8.08)  |
| advantage right     |                             |                             |                             |
| Confidence          | 0.95 <sup>*</sup> (-2.23)   | 0.95 <sup>*</sup> (-2.24)   | 0.95 <sup>*</sup> (-2.25)   |
| Trial number        | -                           | 1.00 (1.72)                 | 1.00 (1.89)                 |
| Trial number × last | -                           | -                           | 0.99 <sup>**</sup> (-2.90)  |
| fixation right      |                             |                             |                             |
| Constant            | 0.65 <sup>**</sup> (-2.82)  | 0.59 <sup>**</sup> (-3.16)  | 0.83 <sup>***</sup> (-3.94) |
| Observations        | 2912                        | 2912                        | 2912                        |

|                     | (C) All trials              |                             |                             |
|---------------------|-----------------------------|-----------------------------|-----------------------------|
|                     | (1)                         | (2)                         | (3)                         |
| Last fixation right | 4.07 <sup>***</sup> (15.43) | 4.08 <sup>***</sup> (15.45) | 4.37 <sup>***</sup> (15.93) |
| Relative time       | 3.55 <sup>***</sup> (12.58) | 3.55 <sup>***</sup> (12.55) | 2.39 <sup>***</sup> (10.58) |
| advantage right     |                             |                             |                             |
| Confidence          | 0.95 <sup>*</sup> (-2.57)   | 0.95 <sup>**</sup> (-2.61)  | 0.95 <sup>**</sup> (-2.67)  |
| Trial number        | -                           | 1.00 (1.14)                 | 1.00 (1.03)                 |
| Trial number × last | -                           | -                           | 1.00 (-1.32)                |
| fixation right      |                             |                             |                             |
| Constant            | 0.65 <sup>**</sup> (-3.27)  | 0.61 <sup>**</sup> (-3.35)  | 0.92 <sup>*</sup> (-2.12)   |
| Observations        | 6724                        | 6724                        | 6724                        |

Note. Odds Ratios; z statistics in parentheses, <sup>\*</sup>  $p < .05$ , <sup>\*\*</sup>  $p < .01$ , <sup>\*\*\*</sup>  $p < .001$ .

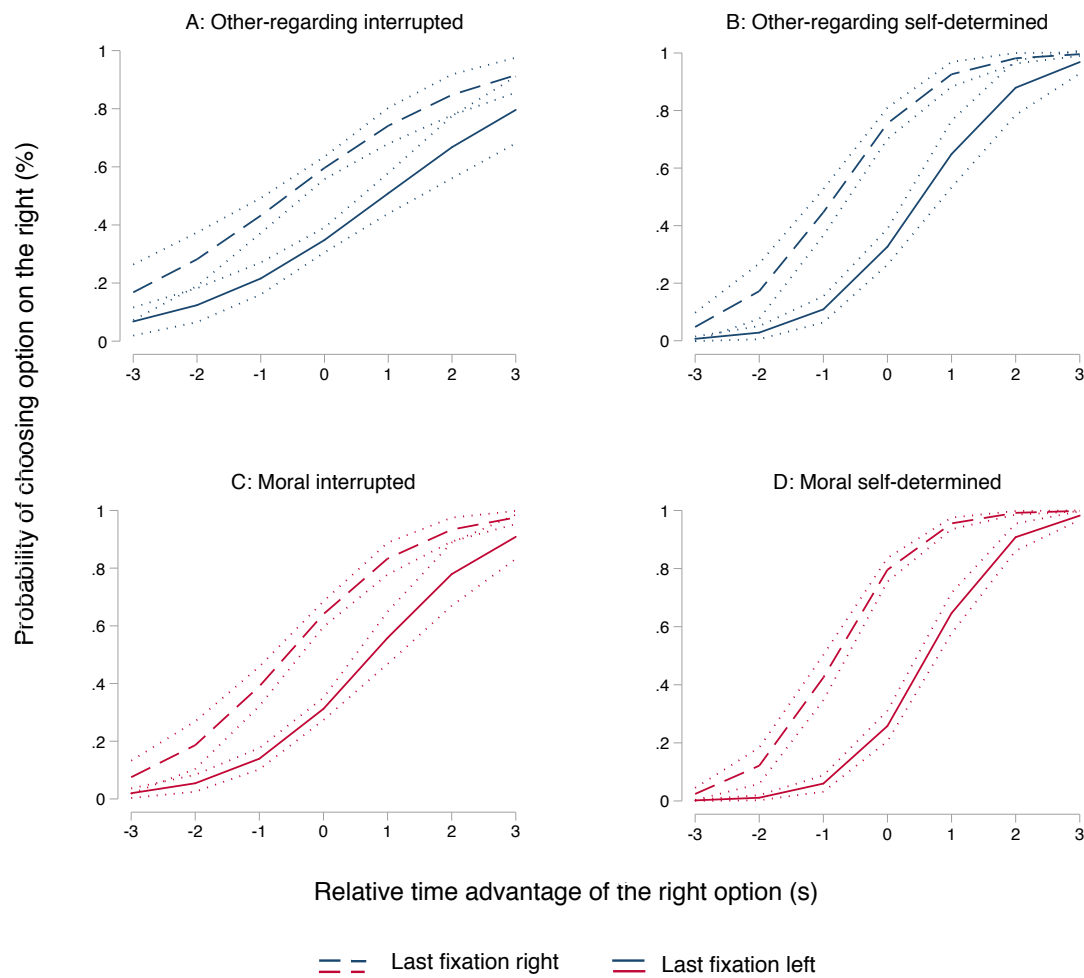**Fig. S3.**

Effect of direction of last fixation on choice probability for (A) other-regarding choices in interrupted trials, (B) other-regarding choices in self-determined trials, (C) moral choices in interrupted trials and (D) moral choices in self-determined trials. Dotted lines indicate 95% confidence intervals.  $N = 116$ .

### Semantic differences

To analyze how semantic differences between the alternatives presented on the screen affect subsequent choices and attention processes, we conducted a number of additional analyses.

Table S8

*Descriptive statistics of fixation number and duration for self-determined (A) and interrupted choices (B).*

|                                | (A) Self-determined | (B) Interrupted |
|--------------------------------|---------------------|-----------------|
| Fixation number                | 19 (5)              | 23 (4)          |
| Fixation duration (in seconds) | 0.11 (0.03)         | 0.11 (0.02)     |
| Observations                   | 2497                | 2912            |

*Note.* For fixation number, median and median average deviation (in parentheses) are reported due to a skewed distributions. For fixation duration, mean and standard deviation (in parentheses) are reported.

Table S9

*Repeated measured linear regression using interrupted choice / self-determined choice to predict (A) fixation number and (B) fixation duration.*

|              | (A) Fixation number          | (B) Fixation duration        |
|--------------|------------------------------|------------------------------|
| Interrupted  | 0.12 <sup>***</sup> (5.84)   | -0.00 <sup>***</sup> (-3.80) |
| Constant     | 3.03 <sup>***</sup> (125.13) | 0.11 <sup>***</sup> (60.23)  |
| Observations | 224                          | 224                          |

*Note.* Unstandardized regression coefficients are reported, z in parentheses. Fixation number is log-transformed due to a skewed distribution. \*  $p < .05$ , \*\*  $p < .01$ , \*\*\*  $p < .001$ .

Table S10

*The influence of semantic differences on choosing the target option and on information search*

|                             | (A) OR (target choice) | (B) Fixation number (log)   | (C) Fixation duration        |
|-----------------------------|------------------------|-----------------------------|------------------------------|
| Alternatives including verb | 1.09 (1.22)            | 1.15 <sup>***</sup> (16.32) | -0.01 <sup>***</sup> (-8.89) |

|              |              |                  |                   |
|--------------|--------------|------------------|-------------------|
| Constant     | 0.97 (-0.60) | 2.96*** (131.76) | -0.11*** (-66.13) |
| Observations | 5409         | 5409             | 5409              |

*Note.* (A) Odds Ratios are reported, (B) and (C) unstandardized coefficients are reported; *z* statistics in parentheses, \*  $p < .05$ , \*\*  $p < .01$ , \*\*\*  $p < .001$ .

Table S11

*The influence of semantic differences on choosing the right option and on the link between last fixation and subsequent choice.*

|                               | (A) Self-determined | (B) Interrupted   | (C) All trials    |
|-------------------------------|---------------------|-------------------|-------------------|
|                               | OR (right option)   | OR (right option) | OR (right option) |
| Alternative including verb    | 0.92 (-0.73)        | 1.08 (0.83)       | 0.98 (-0.23)      |
| Alternative including verb    | 0.89 (-0.48)        | 0.89 (-0.64)      | 0.86 (1.06)       |
| × Last fixation right         |                     |                   |                   |
| Last fixation right           | 7.98*** (11.20)     | 3.23*** (10.51)   | 4.07*** (15.44)   |
| Relative time advantage right | 9.79*** (9.12)      | 3.03*** (8.32)    | 3.53*** (12.47)   |
| Confidence                    | 0.96 (-0.89)        | 0.95* (-2.23)     | 0.95** (-2.61)    |
| Trial number                  | 1.00* (-2.13)       | 1.00 (1.70)       | 1.00 (1.13)       |
| Constant                      | 1.11 (1.28)         | 0.83*** (-3.73)   | 0.93* (-2.01)     |
| Observations                  | 2540                | 2912              | 6724              |

*Note.* Odds Ratios; *z* statistics in parentheses, \*  $p < .05$ , \*\*  $p < .01$ , \*\*\*  $p < .001$ . All variables are centered.

Table S12

*Study 1: Choice of right option predicted by last fixation for the autonomous (A), exogenous group (B), and both groups combined (C).*

|                                          | (A) Autonomous      |         | (B) Exogenous       |         | (C) Pooled          |         |
|------------------------------------------|---------------------|---------|---------------------|---------|---------------------|---------|
|                                          | OR (right option)   |         | OR (right option)   |         | OR (right option)   |         |
| Character count                          | 1.00                | (0.38)  | 1.00                | (-0.25) | 1.00                | (-0.87) |
| Last fixation right                      | 9.41 <sup>***</sup> | (11.62) | 3.44 <sup>***</sup> | (10.90) | 4.37 <sup>***</sup> | (15.89) |
| Character count ×<br>Last fixation right | 0.99                | (-0.74) | 1.00                | (-0.52) | 1.00                | (-0.89) |
| Relative time<br>advantage right         | 4.79 <sup>***</sup> | (8.91)  | 2.31 <sup>***</sup> | (7.93)  | 2.38 <sup>***</sup> | (10.30) |
| Confidence                               | 0.96                | (-1.02) | 0.95 <sup>*</sup>   | (-2.16) | 0.95 <sup>**</sup>  | (-2.66) |
| Trial number                             | 1.00 <sup>*</sup>   | (-2.19) | 1.00                | (1.57)  | 1.00                | (0.96)  |
| Constant                                 | 1.11                | (1.28)  | 0.83 <sup>***</sup> | (-3.84) | 0.93 <sup>*</sup>   | (-2.06) |
| Observations                             | 2540                |         | 2912                |         | 6724                |         |

*Note.* Odds Ratios; *z* statistics in parentheses. All variables are centered, <sup>\*</sup>  $p < .05$ , <sup>\*\*</sup>  $p < .01$ , <sup>\*\*\*</sup>  $p < .001$ .

Table S13

*Study 2: Choice of right option predicted by last fixation for the autonomous (A) and exogenous group (B).*

|                                          | (A) Autonomous       |         | (B) Exogenous     |         |
|------------------------------------------|----------------------|---------|-------------------|---------|
|                                          | OR (right option)    |         | OR (right option) |         |
| Character count                          | 1.00                 | (0.76)  | 1.00              | (0.07)  |
| Last fixation right                      | 10.86 <sup>***</sup> | (21.89) | 1.21 <sup>*</sup> | (2.33)  |
| Character count × Last<br>fixation right | 1.00                 | (-0.23) | 0.99              | (-1.45) |

|                         |                             |                            |
|-------------------------|-----------------------------|----------------------------|
| Relative time advantage | 4.26 <sup>***</sup> (14.99) | 0.85 <sup>**</sup> (-2.64) |
| right                   |                             |                            |
| Confidence              | 0.96 (-1.11)                | 1.00 (-0.07)               |
| Trial number            | 1.00 (0.20)                 | 1.00 (0.36)                |
| Constant                | 0.71 (-4.92)                | 0.99 (-0.14)               |
| Observations            | 2754                        | 2932                       |

*Note.* Odds Ratios;  $z$  statistics in parentheses. All variables are centered, <sup>\*</sup>  $p < .05$ , <sup>\*\*</sup>  $p < .01$ , <sup>\*\*\*</sup>  $p < .001$ .
